# Impact of liver metastases status on survival outcomes of first-line immunotherapy in extensive stage small cell lung cancer: a systematic review and meta-analysis

Yan Lin<sup>1,\*</sup>, Wei Jiang<sup>2,\*</sup>, Cui-Yun Su<sup>2</sup>, Xin-Bin Pan<sup>3</sup>

<sup>1</sup>Department of Gastroenterology, Jiangbin Hospital of Guangxi Zhuang Autonomous Region, Nanning 530000, Guangxi, P.R. China

<sup>2</sup>Department of Respiratory Oncology, Guangxi Medical University Cancer Hospital, Nanning 530021, Guangxi, P.R. China

<sup>3</sup>Department of Radiation Oncology, Guangxi Medical University Cancer Hospital, Nanning 530021, Guangxi, P.R. China

\*Equal contribution

**Correspondence to:** Xin-Bin Pan; email: [panxinbin@gxmu.edu.cn](mailto:panxinbin@gxmu.edu.cn)

**Keywords:** small cell lung cancer, SCLC, extensive stage, immunotherapy, liver metastases

**Received:** May 31, 2023

**Accepted:** August 29, 2023

**Published:** September 18, 2023

**Copyright:** © 2023 Lin et al. This is an open access article distributed under the terms of the [Creative Commons Attribution License](https://creativecommons.org/licenses/by/3.0/) (CC BY 3.0), which permits unrestricted use, distribution, and reproduction in any medium, provided the original author and source are credited.

## ABSTRACT

**Purpose:** This study aims to assess the impact of liver metastases status on survival outcomes of first-line immunotherapy in extensive stage small cell lung cancer (ES-SCLC) patients.

**Materials and methods:** Comprehensive searches were conducted in the Cochrane Library databases, Embase, PubMed, and abstracts from WCLC, ESMO, and ASCO from inception to December 2022. Randomized controlled trials reporting progression-free survival (PFS) and/or overall survival (OS) of first-line immunotherapy in ES-SCLC patients were included.

**Results:** Six trials involving 3501 patients were analyzed, comprising 1350 patients with liver metastases and 2151 without. The quality of the included trials was consistently high. Pooled results revealed that immunotherapy plus chemotherapy did not significantly improve PFS (hazard ratio [HR] = 0.82, 95% confidence interval [CI]: 0.68-1.00, P = 0.05) and OS (HR = 0.89, 95% CI: 0.79-1.00, P = 0.05) in ES-SCLC patients with liver metastases compared to chemotherapy alone. However, immunotherapy plus chemotherapy improved PFS (HR = 0.66, 95% CI: 0.57-0.77, P < 0.01) and OS (HR = 0.74, 95% CI: 0.67-0.82, P < 0.01) in ES-SCLC patients without liver metastases compared to chemotherapy alone.

**Conclusions:** First-line immunotherapy plus chemotherapy significantly improved PFS and OS in ES-SCLC patients without liver metastases compared to chemotherapy alone. However, patients with liver metastases did not experience comparable benefits.

## INTRODUCTION

Small cell lung cancer (SCLC) is a highly aggressive neuroendocrine malignancy [1]. The rapid growth rate of SCLC leads to about 75% of cases being diagnosed at an advanced stage with distant metastases [2, 3]. Among these cases, approximately 25% of extensive

stage SCLC (ES-SCLC) patients present with liver metastases [4, 5].

Immunotherapy combined with chemotherapy has shown potential for improved survival outcomes as a first-line treatment for ES-SCLC patients [6–12]. However, variations in the efficacy of immunotherapy

based on liver metastases status have raised important questions. This systematic review and meta-analysis aims to assess the survival outcomes of first-line immunotherapy in ES-SCLC patients, considering liver metastases status.

## MATERIALS AND METHODS

### Trial search

In accordance with the Preferred Reporting Items for Systematic Reviews and Meta-Analyses guidelines [13, 14], two authors (Yan Lin and Wei Jiang) independently conducted thorough searches across various databases including the Cochrane Library, Embase, PubMed, as well as abstracts from World Conference on Lung Cancer, European Society of Medical Oncology, and American Society of Clinical Oncology, spanning from inception to December 2022. Key search terms included small cell lung cancer, SCLC, extensive stage, stage IV, randomized controlled trial, and RCT. Furthermore, references from significant clinical trials were also screened.

### Trial selection

Trials meeting criteria including randomized controlled design, histologically/cytologically confirmed SCLC, extensive stage, reporting of immunotherapy and chemotherapy survival outcomes, and provision of hazard ratios (HRs) with 95% confidence intervals (CIs) for progression-free survival (PFS) and/or overall survival (OS) in patients with liver metastases were included.

### Trial quality assessment

The methodological quality of trials was independently assessed by two authors (Yan Lin and Wei Jiang) using the Cochrane Risk of Bias tool [15]. Any discrepancies were resolved through discussion or consultation with a third researcher (Xin-Bin Pan).

### Data extraction

Data from included trials were extracted by two authors (Cui-Yun Su and Xin-Bin Pan), adhering to the Preferred Reporting Items for Systematic Reviews and Meta-Analysis guidelines.

### Statistical analysis

Estimated HRs of PFS and OS along with their respective 95% CI limits were calculated and illustrated through forest plots. Sensitivity analyses were carried out to gauge the impact of excluding specific trials.

Begg's and Egger's tests were used to assess publication bias. Random effect models were employed in the presence of statistical heterogeneity ( $I^2 \geq 50\%$ ,  $P < 0.10$ ), while fixed effect models were utilized in its absence.

Statistical analyses were performed using R software version 4.3.0 and SPSS Statistics Version 26.0 (IBM Co., Armonk, NY, USA). A significance level of  $P < 0.05$  was adopted.

## RESULTS

### Characteristics of included trials

Following the evaluation of 8467 studies, 6 phase III randomized clinical trials were incorporated into the analysis [7, 9–12, 16]. The trial selection process is visually represented in Figure 1. These trials encompassed 3501 ES-SCLC patients, with 1350 having liver metastases and 2151 without. A detailed account of trial characteristics is presented in Table 1, while the methodological quality is delineated in Figure 2. The quality of the included trials was consistently high.

### Pooled HRs for PFS

For patients with liver metastases, PFS HR was reported in three trials [7, 11, 12]. No heterogeneity was detected ( $I^2 = 0.00\%$ ,  $P = 0.71$ ), warranting the application of a fixed effect model. Immunotherapy plus chemotherapy did not yield a significant improvement in PFS when compared to chemotherapy alone (HR = 0.82, 95% CI: 0.68–1.00,  $P = 0.05$ ; Figure 3A).

Similarly, for patients without liver metastases, PFS HR was reported in three trials as well [7, 11, 12]. No heterogeneity was observed ( $I^2 = 0.00\%$ ,  $P = 0.78$ ), prompting the use of a fixed effect model. Immunotherapy plus chemotherapy demonstrated improved PFS compared to chemotherapy alone (HR = 0.66, 95% CI: 0.57–0.77,  $P < 0.01$ ; Figure 3B).

Sensitivity analyses confirmed the robustness of these findings. Figure 4A displays the sensitivity analyses of PFS for patients with liver metastases, while Figure 4B exhibits the sensitivity analyses of PFS for patients without liver metastases. No discernible publication bias was detected, as evidenced by the results of Egger's ( $P = 0.92$ ) and Begg's ( $P = 0.98$ ) tests across the three randomized clinical trials involving patients with liver metastases (Figure 5A). Similarly, among the three randomized clinical trials involving patients without liver metastases, Egger's ( $P = 0.90$ ) and Begg's ( $P = 0.94$ ) tests yielded no conspicuous indications of publication bias (Figure 5B).

## Pooled HRs for OS

OS HR was reported in 6 trials for patients with liver metastases [7, 9–12, 16]. No heterogeneity was observed ( $I^2 = 0.00\%$ ,  $P = 0.62$ ), leading to the application of a fixed effect model. Immunotherapy plus chemotherapy did not substantially enhance OS when compared to chemotherapy alone (HR = 0.89, 95% CI: 0.79-1.00,  $P = 0.05$ ; Figure 6A).

Similarly, for patients without liver metastases, OS HR was reported in 6 trials as well [7, 9–12, 16]. No heterogeneity was detected ( $I^2 = 0.00\%$ ,  $P = 0.73$ ),

resulting in the utilization of a fixed effect model. Immunotherapy plus chemotherapy demonstrated improved OS compared to chemotherapy alone (HR = 0.74, 95% CI: 0.67-0.82,  $P < 0.01$ ; Figure 6B).

Sensitivity analyses confirmed the robustness of these findings. Figure 7A illustrates the sensitivity analyses of OS for patients with liver metastases, while Figure 7B presents the sensitivity analyses of OS for patients without liver metastases. There was no noticeable indication of publication bias, as indicated by the results of Egger's ( $P = 0.53$ ) and Begg's ( $P = 0.65$ ) tests across the six randomized clinical trials involving patients with

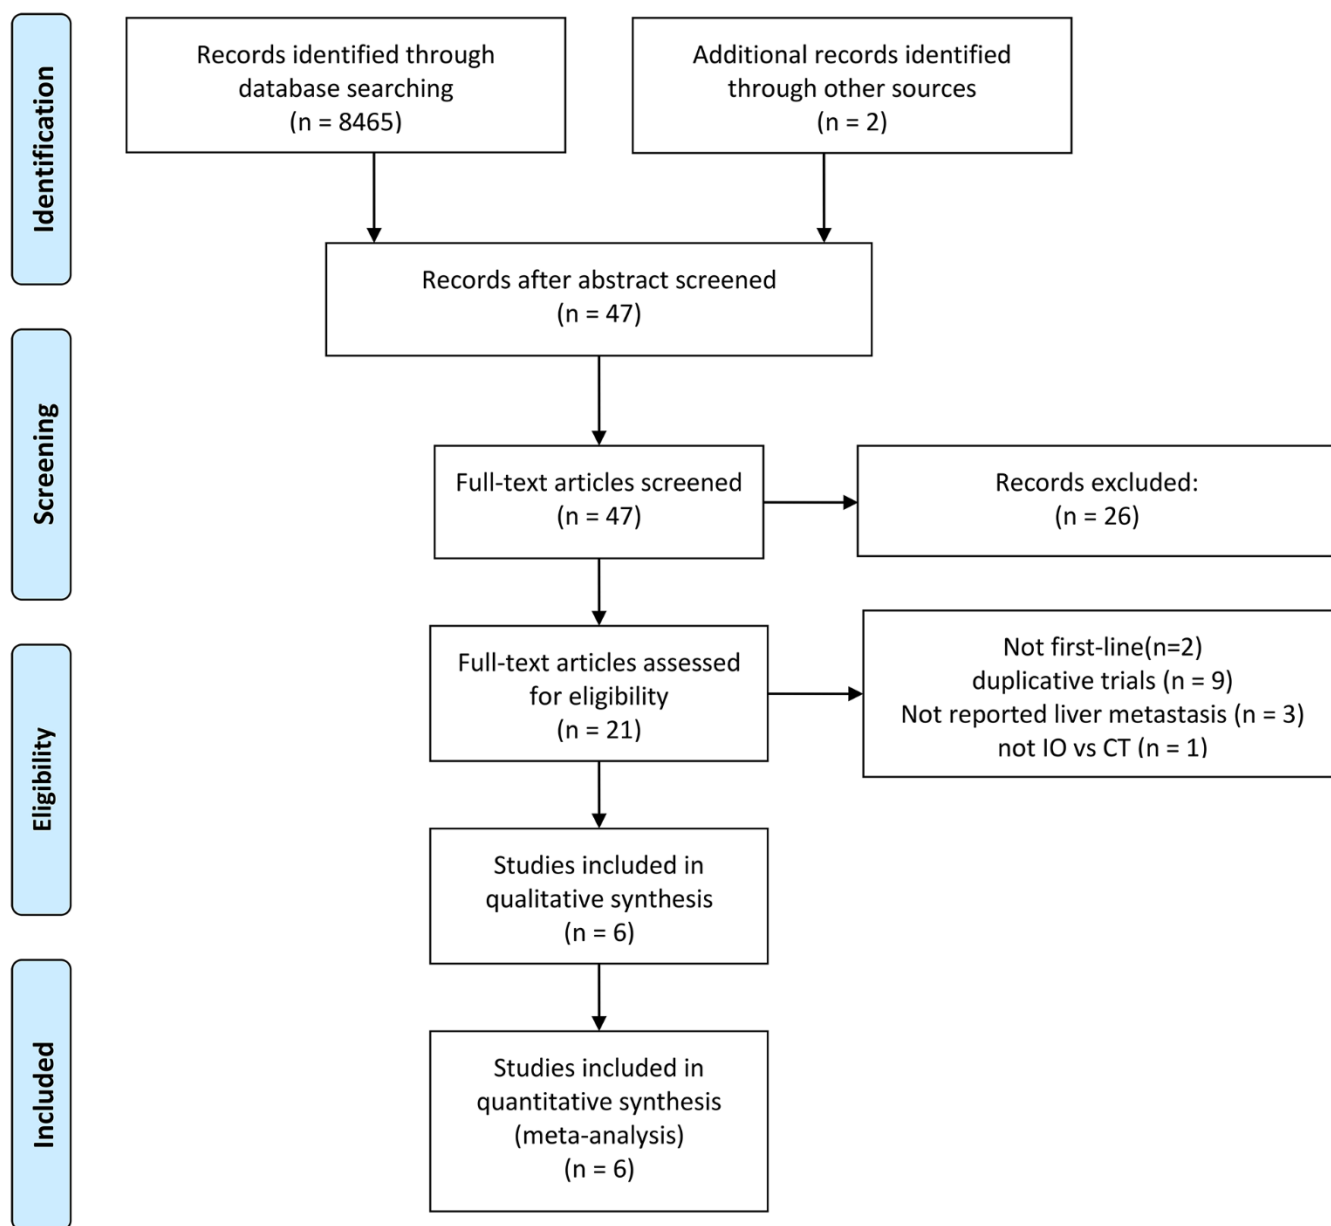

Figure 1. Flowchart illustrating trial selection. IO: immunotherapy. CT: chemotherapy.

**Table 1. Baseline characteristics of the included studies.**

| Trials                   | Year | Area      | Phase | Treatments                          | Liver metastases |     |
|--------------------------|------|-----------|-------|-------------------------------------|------------------|-----|
|                          |      |           |       |                                     | Yes              | No  |
| KEYNOTE-604              | 2020 | worldwide | 3     | Pembrolizumab+EP/EC q3w×4           | 95               | 133 |
|                          |      |           |       | EP/EC q3w×4                         | 92               | 133 |
| IMpower-133              | 2018 | worldwide | 3     | Atezolizumab+EC q3w×4               | 77               | 124 |
|                          |      |           |       | EC q3w×4                            | 72               | 130 |
| CASPIAN-durva            | 2019 | worldwide | 3     | Durvalumab+EP/EC q3w×6              | 108              | 160 |
|                          |      |           |       | EP/EC q3w×6                         | 104              | 165 |
| CASPIAN-tremeli+durva    | 2020 | worldwide | 3     | Durvalumab+Tremelimumab+EP/EC q3w×6 | 117              | 151 |
|                          |      |           |       | EP/EC q3w×6                         | 104              | 165 |
| CAPSTONE-1               | 2022 | China     | 3     | Adebrelimab+EC q3w×4-6              | 73               | 157 |
|                          |      |           |       | EC q3w×4-6                          | 74               | 158 |
| CheckMate-451-nivo       | 2021 | worldwide | 3     | Nivolumab+EP/EC q3w×3-4             | 106              | 174 |
|                          |      |           |       | EP/EC q3w×3-4                       | 109              | 166 |
| CheckMate-451-ipili+nivo | 2021 | worldwide | 3     | Ipilimumab+nivolumab+EP/EC q3w×3-4  | 110              | 169 |
|                          |      |           |       | EP/EC q3w×3-4                       | 109              | 166 |

EP, etoposide+cisplatin; EC, etoposide+carboplatin; Durva, durvalumab; Tremeli, tremelimumab; Nivo, nivolumab; Ipili, ipilimumab.

|                       | Random sequence generation (selection bias) | Allocation concealment (selection bias) | Blinding of participants and personnel (performance bias) | Blinding of outcome assessment (detection bias) | Incomplete outcome data (attrition bias) | Selective reporting (reporting bias) | Other bias |
|-----------------------|---------------------------------------------|-----------------------------------------|-----------------------------------------------------------|-------------------------------------------------|------------------------------------------|--------------------------------------|------------|
| KEYNOTE-604           | √                                           | √                                       | √                                                         | √                                               | √                                        | √                                    | ?          |
| IMPOWER-133           | √                                           | √                                       | √                                                         | ?                                               | √                                        | √                                    | ?          |
| CASPIAN-durva         | √                                           | √                                       | ×                                                         | ×                                               | √                                        | ?                                    | ?          |
| CASPIAN-tremeli+durva | √                                           | √                                       | ×                                                         | ×                                               | √                                        | ?                                    | ?          |
| CAPSTONE-1            | √                                           | √                                       | √                                                         | √                                               | √                                        | √                                    | ?          |
| CheckMate-451         | √                                           | √                                       | √                                                         | √                                               | √                                        | √                                    | ?          |

**Figure 2. Risk of bias assessment for the included trials.**

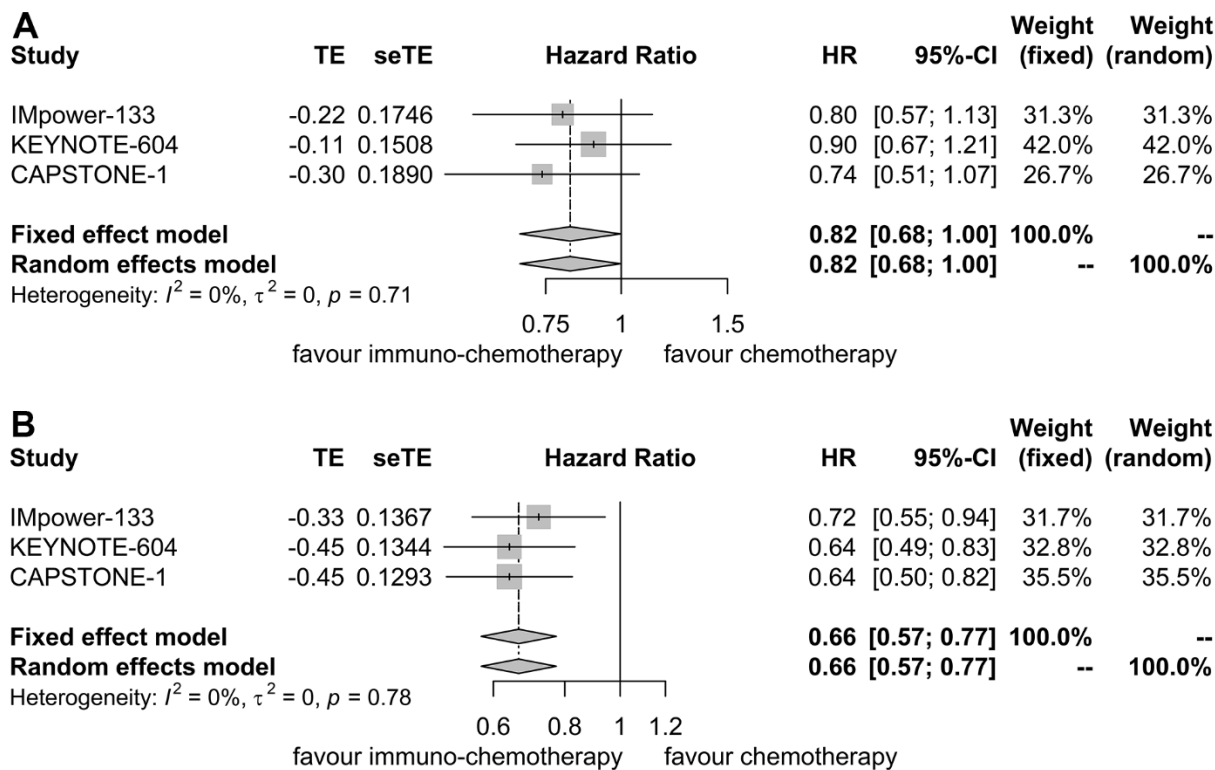

Figure 3. Forest plot displaying hazard ratios for comparing progression-free survival between immuno-chemotherapy and chemotherapy. (A) Patients with liver metastases. (B) Patients without liver metastases.

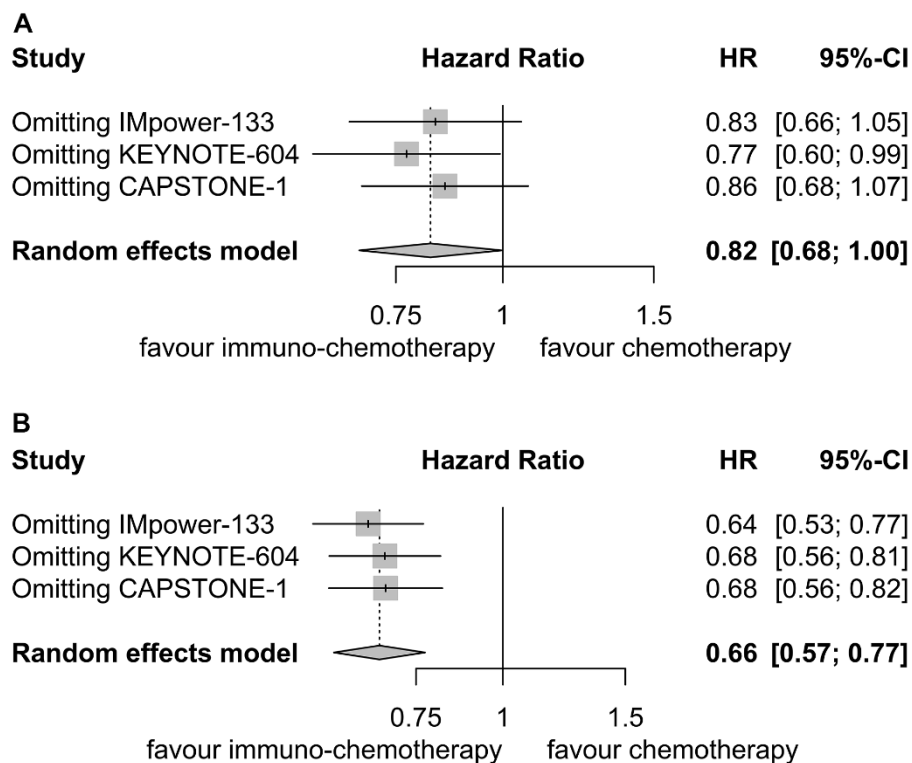

Figure 4. Sensitivity analysis for progression-free survival. (A) Patients with liver metastases. (B) Patients without liver metastases.

liver metastases (Figure 8A). Similarly, among the six randomized clinical trials involving patients without liver metastases, Egger's ( $P = 0.61$ ) and Begg's ( $P = 0.65$ ) tests revealed no apparent presence of publication bias (Figure 8B).

## DISCUSSION

This systematic review and meta-analysis concluded that first-line immunotherapy plus chemotherapy significantly enhanced PFS and OS in ES-SCLC patients without liver metastases compared to chemotherapy alone. However, for patients with liver metastases, the benefits were not as

pronounced. These findings emphasized the need for further exploration into the immunosuppressive micro-environment that characterized liver metastases, thereby shedding light on the observed divergence.

SCLC, with its high tumor mutational burden, is notably responsive to immunotherapy [17, 18]. Multiple trials have substantiated the survival benefits of blocking the cytotoxic T-lymphocyte-associated protein 4 (CTLA-4), programmed death 1 (PD-1), and programmed death ligand 1 (PD-L1) axis, either in conjunction with chemotherapy or as maintenance therapy, for ES-SCLC patients [19–21]. However, several studies indicated that

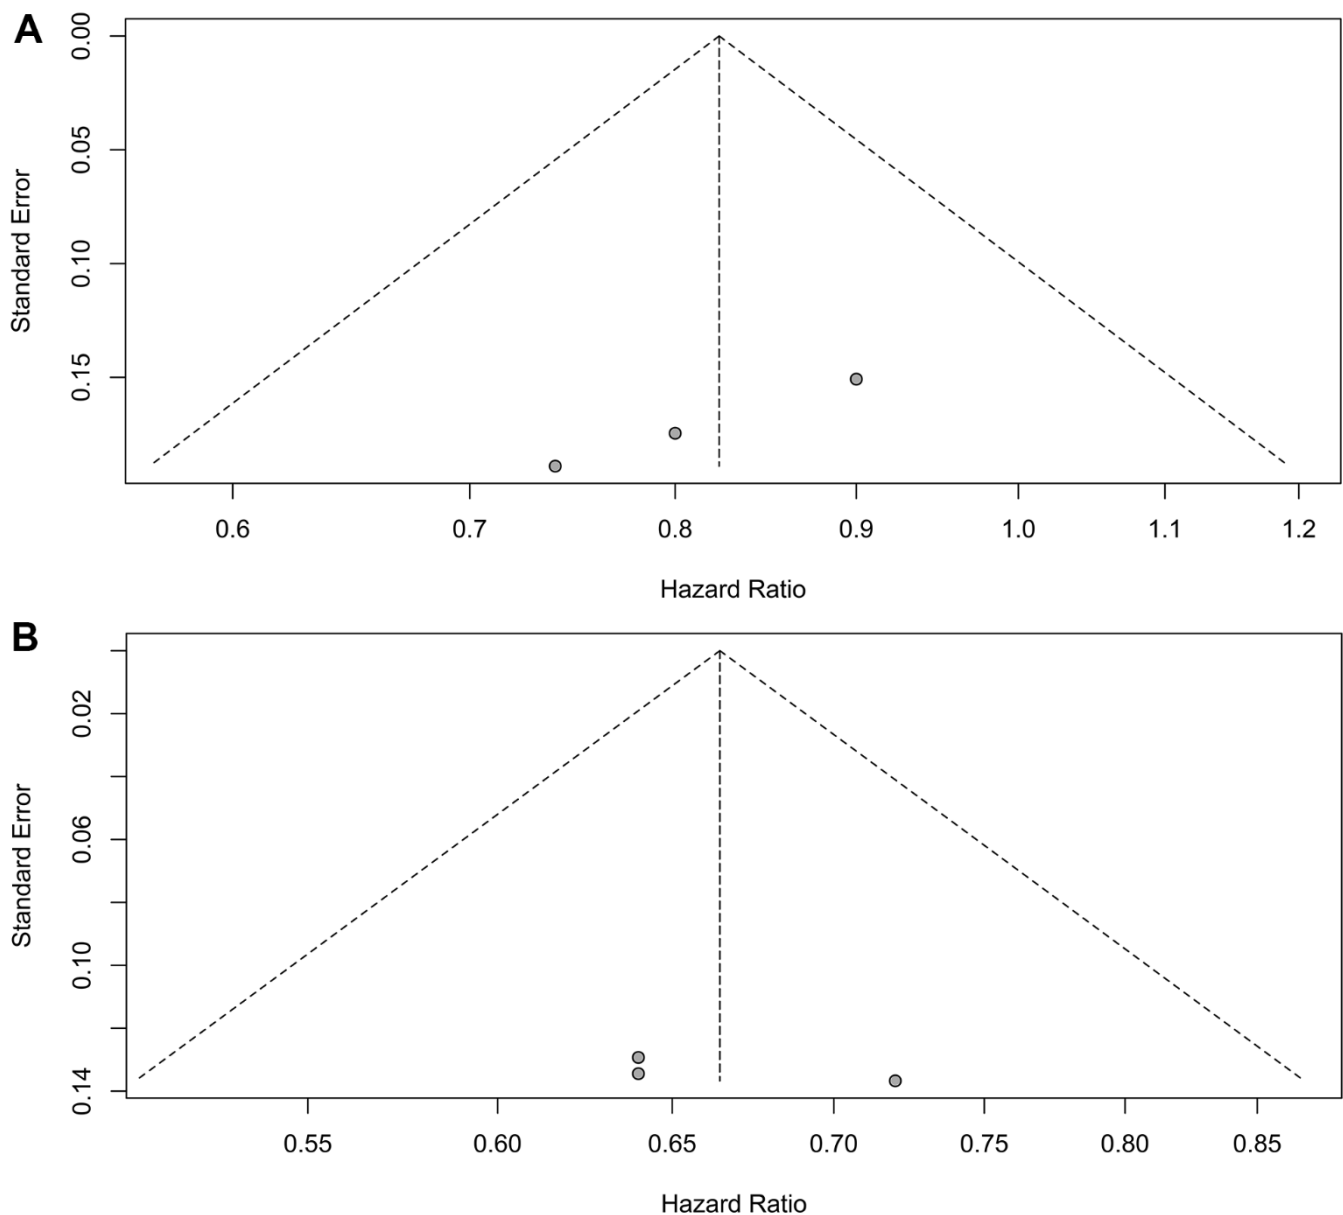

**Figure 5. Assessment of publication bias for progression-free survival. (A) Patients with liver metastases. (B) Patients without liver metastases.**

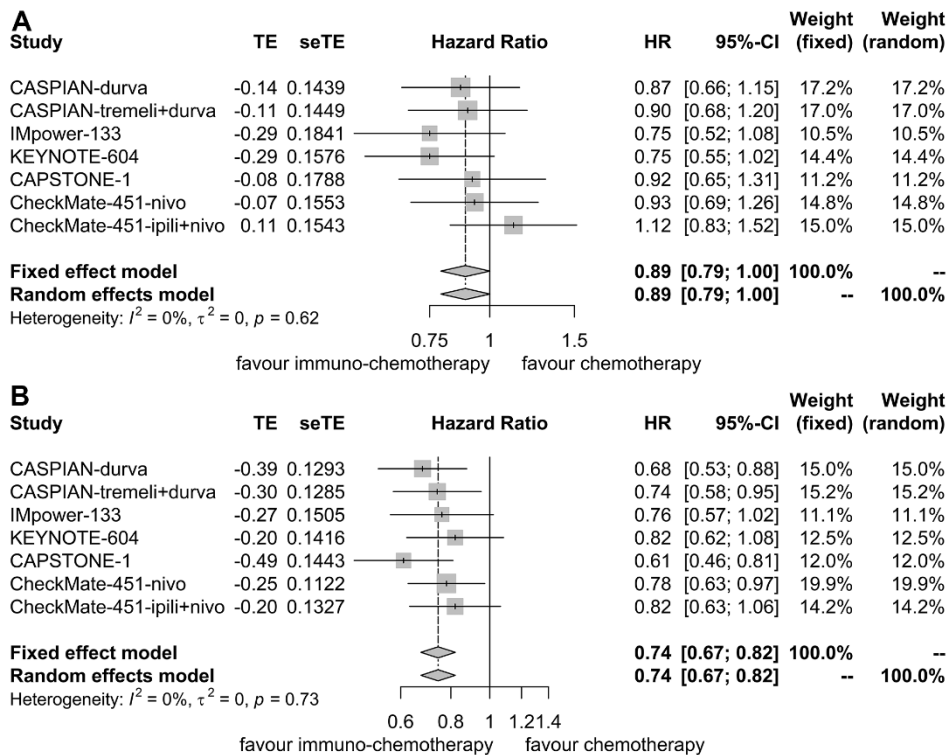

Figure 6. Forest plot illustrating hazard ratios for overall survival between immuno-chemotherapy and chemotherapy. (A) Patients with liver metastases. (B) Patients without liver metastases.

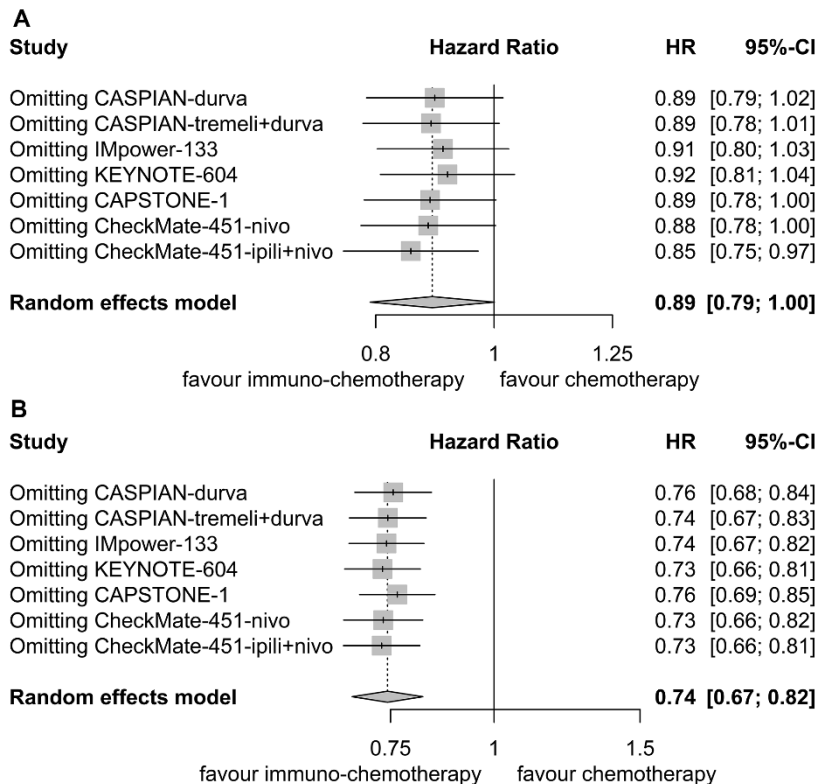

Figure 7. Sensitivity analysis for overall survival. (A) Patients with liver metastases. (B) Patients without liver metastases.

immunotherapy did not improve OS and PFS of ES-SCLC patients with liver metastases [22–24]. Consequently, disparities in the clinical advantages of immunotherapy in ES-SCLC patients with liver metastases have prompted thorough investigation. Our study contributed to the comprehension of this incongruity, demonstrating that first-line immunotherapy did not confer significant improvements in terms of PFS and OS to ES-SCLC patients with liver metastases. However, the observed P values of 0.05 suggested a potential trend towards improvement, warranting cautious interpretation and emphasizing the need for prospective studies.

The explanation for these findings may lie in the immunosuppressive microenvironment within liver metastases, which undermined the efficacy of immunotherapy [25]. Liver non-parenchymal cells present antigens to T-cells in a tolerogenic manner [26], leading to the apoptosis of activated antigen-specific T-cells upon interaction with monocyte-

derived macrophages [27]. This phenomenon may account for the observed absence of immunotherapy benefits. Support for this explanation was found in a pooled analysis of non-small cell lung cancer patients with liver metastases, which revealed no discernible immunotherapy advantage (HR = 0.80, 95% CI: 0.49-1.31) [28].

A limitation of this study lies in its inability to differentiate patients with isolated liver metastases from those with metastases in other organs. This limitation underscored the necessity for judicious interpretation of the conclusions drawn. Additional research is indispensable to validate the findings presented in this systematic review and meta-analysis.

In conclusion, first-line immunotherapy plus chemotherapy significantly improved PFS and OS in ES-SCLC patients without liver metastases compared to chemotherapy alone. However, patients with liver metastases did not experience comparable benefits.

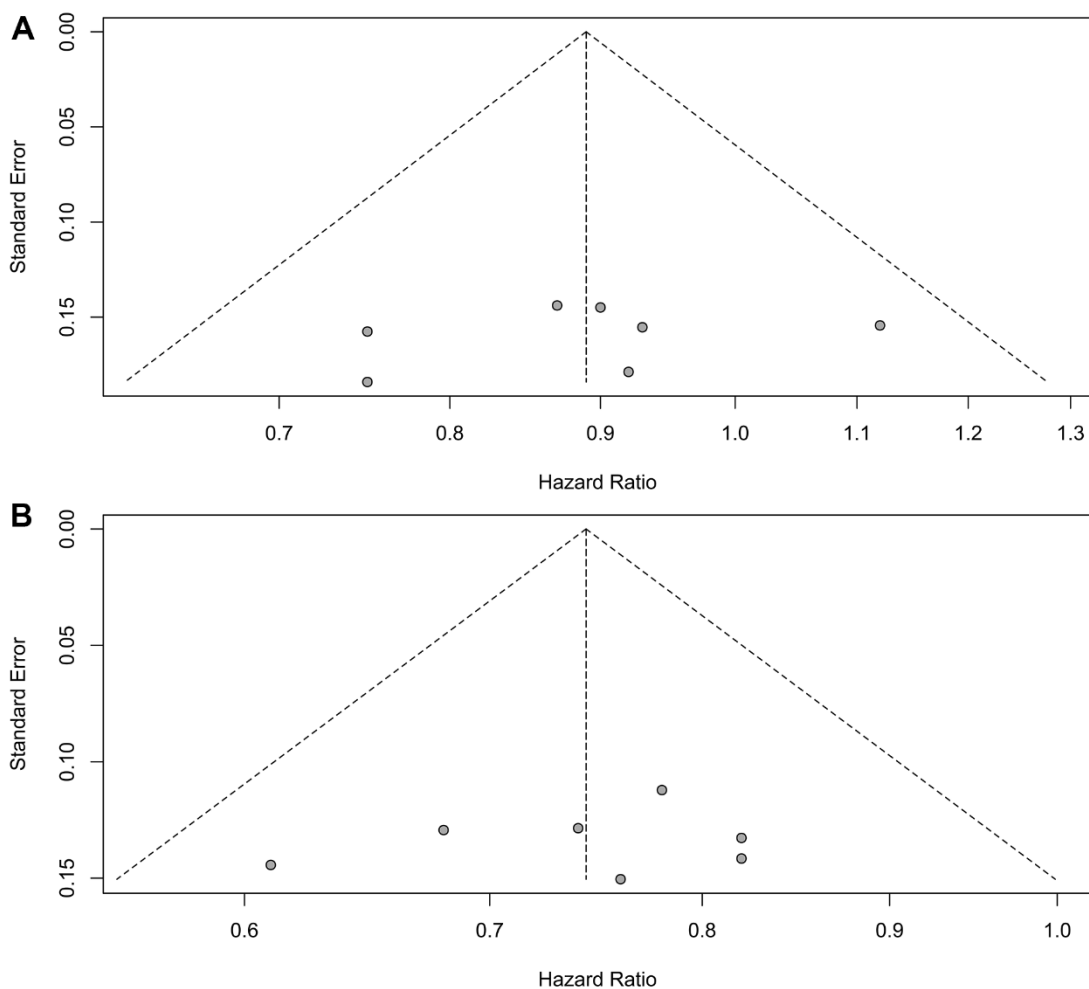

**Figure 8. Assessment of publication bias for overall survival. (A) Patients with liver metastases. (B) Patients without liver metastases.**



## AUTHOR CONTRIBUTIONS

Conceptualization: Xin-Bin Pan. Methodology: Yan Lin and Wei Jiang. Formal Analysis: Cui-Yun Su. Validation: Yan Lin and Wei Jiang. Writing-Original Draft Preparation: Yan Lin. Writing-Review and Editing: Xin-Bin Pan.

## CONFLICTS OF INTEREST

The authors declare no conflicts of interest.

## FUNDING

No funding was provided for this study.

## REFERENCES

1. Sung H, Ferlay J, Siegel RL, Laversanne M, Soerjomataram I, Jemal A, Bray F. Global Cancer Statistics 2020: GLOBOCAN Estimates of Incidence and Mortality Worldwide for 36 Cancers in 185 Countries. *CA Cancer J Clin*. 2021; 71:209–49. <https://doi.org/10.3322/caac.21660> PMID:33538338
2. van Meerbeeck JP, Fennell DA, De Ruyscher DK. Small-cell lung cancer. *Lancet*. 2011; 378:1741–55. [https://doi.org/10.1016/S0140-6736\(11\)60165-7](https://doi.org/10.1016/S0140-6736(11)60165-7) PMID:21565397
3. Rudin CM, Ismaila N, Hann CL, Malhotra N, Movsas B, Norris K, Pietanza MC, Ramalingam SS, Turrisi AT 3rd, Giaccone G. Treatment of Small-Cell Lung Cancer: American Society of Clinical Oncology Endorsement of the American College of Chest Physicians Guideline. *J Clin Oncol*. 2015; 33:4106–11. <https://doi.org/10.1200/JCO.2015.63.7918> PMID:26351333
4. Ni J, Zhang X, Wang H, Si X, Xu Y, Zhao J, Chen M, Zhang L, Wang M. Clinical characteristics and prognostic model for extensive-stage small cell lung cancer: A retrospective study over an 8-year period. *Thorac Cancer*. 2022; 13:539–48. <https://doi.org/10.1111/1759-7714.14289> PMID:34970848
5. Rudin CM, Brambilla E, Faivre-Finn C, Sage J. Small-cell lung cancer. *Nat Rev Dis Primers*. 2021; 7:3. <https://doi.org/10.1038/s41572-020-00235-0> PMID:33446664
6. Reck M, Luft A, Szczesna A, Havel L, Kim SW, Akerley W, Pietanza MC, Wu YL, Zielinski C, Thomas M, Felip E, Gold K, Horn L, et al. Phase III Randomized Trial of Ipilimumab Plus Etoposide and Platinum Versus Placebo Plus Etoposide and Platinum in Extensive-Stage Small-Cell Lung Cancer. *J Clin Oncol*. 2016; 34:3740–8. <https://doi.org/10.1200/JCO.2016.67.6601> PMID:27458307
7. Rudin CM, Awad MM, Navarro A, Gottfried M, Peters S, Csösz T, Cheema PK, Rodriguez-Abreu D, Wollner M, Yang JC, Mazieres J, Orlandi FJ, Luft A, et al, and KEYNOTE-604 Investigators. Pembrolizumab or Placebo Plus Etoposide and Platinum as First-Line Therapy for Extensive-Stage Small-Cell Lung Cancer: Randomized, Double-Blind, Phase III KEYNOTE-604 Study. *J Clin Oncol*. 2020; 38:2369–79. <https://doi.org/10.1200/JCO.20.00793> PMID:32468956
8. Cheng Y, Han L, Wu L, Chen J, Sun H, Wen G, Ji Y, Dvorkin M, Shi J, Pan Z, Shi J, Wang X, Bai Y, et al, and ASTRUM-005 Study Group. Effect of First-Line Serplulimab vs Placebo Added to Chemotherapy on Survival in Patients With Extensive-Stage Small Cell Lung Cancer: The ASTRUM-005 Randomized Clinical Trial. *JAMA*. 2022; 328:1223–32. <https://doi.org/10.1001/jama.2022.16464> PMID:36166026
9. Paz-Ares L, Dvorkin M, Chen Y, Reinmuth N, Hotta K, Trukhin D, Statsenko G, Hochmair MJ, Özgüroğlu M, Ji JH, Voitko O, Poltoratskiy A, Ponce S, et al, and CASPIAN investigators. Durvalumab plus platinum-etoposide versus platinum-etoposide in first-line treatment of extensive-stage small-cell lung cancer (CASPIAN): a randomised, controlled, open-label, phase 3 trial. *Lancet*. 2019; 394:1929–39. [https://doi.org/10.1016/S0140-6736\(19\)32222-6](https://doi.org/10.1016/S0140-6736(19)32222-6) PMID:31590988
10. Goldman JW, Dvorkin M, Chen Y, Reinmuth N, Hotta K, Trukhin D, Statsenko G, Hochmair MJ, Özgüroğlu M, Ji JH, Garassino MC, Voitko O, Poltoratskiy A, et al, and CASPIAN investigators. Durvalumab, with or without tremelimumab, plus platinum-etoposide versus platinum-etoposide alone in first-line treatment of extensive-stage small-cell lung cancer (CASPIAN): updated results from a randomised, controlled, open-label, phase 3 trial. *Lancet Oncol*. 2021; 22:51–65. [https://doi.org/10.1016/S1470-2045\(20\)30539-8](https://doi.org/10.1016/S1470-2045(20)30539-8) PMID:33285097
11. Wang J, Zhou C, Yao W, Wang Q, Min X, Chen G, Xu X, Li X, Xu F, Fang Y, Yang R, Yu G, Gong Y, et al, and CAPSTONE-1 Study Group. Adebrelimab or placebo plus carboplatin and etoposide as first-line treatment for extensive-stage small-cell lung cancer (CAPSTONE-1): a multicentre, randomised, double-blind, placebo-controlled, phase 3 trial. *Lancet Oncol*. 2022; 23:739–47. [https://doi.org/10.1016/S1470-2045\(22\)00224-8](https://doi.org/10.1016/S1470-2045(22)00224-8) PMID:35576956
12. Horn L, Mansfield AS, Szczesna A, Havel L, Krzakowski M, Hochmair MJ, Huemer F, Losonczy G, Johnson ML,

- Nishio M, Reck M, Mok T, Lam S, et al, and IMpower133 Study Group. First-Line Atezolizumab plus Chemotherapy in Extensive-Stage Small-Cell Lung Cancer. *N Engl J Med*. 2018; 379:2220–9.  
<https://doi.org/10.1056/NEJMoa1809064>  
PMID:[30280641](https://pubmed.ncbi.nlm.nih.gov/30280641/)
13. Phan K, Tian DH, Cao C, Black D, Yan TD. Systematic review and meta-analysis: techniques and a guide for the academic surgeon. *Ann Cardiothorac Surg*. 2015; 4:112–22.  
<https://doi.org/10.3978/j.issn.2225-319X.2015.02.04>  
PMID:[25870806](https://pubmed.ncbi.nlm.nih.gov/25870806/)
  14. Moher D, Liberati A, Tetzlaff J, Altman DG, and PRISMA Group. Preferred reporting items for systematic reviews and meta-analyses: the PRISMA statement. *BMJ*. 2009; 339:b2535.  
<https://doi.org/10.1136/bmj.b2535> PMID:[19622551](https://pubmed.ncbi.nlm.nih.gov/19622551/)
  15. Higgins JP, Altman DG, Gøtzsche PC, Jüni P, Moher D, Oxman AD, Savovic J, Schulz KF, Weeks L, Sterne JA, Cochrane Bias Methods Group, and Cochrane Statistical Methods Group. The Cochrane Collaboration’s tool for assessing risk of bias in randomised trials. *BMJ*. 2011; 343:d5928.  
<https://doi.org/10.1136/bmj.d5928> PMID:[22008217](https://pubmed.ncbi.nlm.nih.gov/22008217/)
  16. Owonikoko TK, Park K, Govindan R, Ready N, Reck M, Peters S, Dakhil SR, Navarro A, Rodríguez-Cid J, Schenker M, Lee JS, Gutierrez V, Percent I, et al. Nivolumab and Ipilimumab as Maintenance Therapy in Extensive-Disease Small-Cell Lung Cancer: CheckMate 451. *J Clin Oncol*. 2021; 39:1349–59.  
<https://doi.org/10.1200/JCO.20.02212>  
PMID:[33683919](https://pubmed.ncbi.nlm.nih.gov/33683919/)
  17. Rudin CM, Durinck S, Stawiski EW, Poirier JT, Modrusan Z, Shames DS, Bergbower EA, Guan Y, Shin J, Guillory J, Rivers CS, Foo CK, Bhatt D, et al. Comprehensive genomic analysis identifies SOX2 as a frequently amplified gene in small-cell lung cancer. *Nat Genet*. 2012; 44:1111–6.  
<https://doi.org/10.1038/ng.2405> PMID:[22941189](https://pubmed.ncbi.nlm.nih.gov/22941189/)
  18. George J, Lim JS, Jang SJ, Cun Y, Ozretić L, Kong G, Leenders F, Lu X, Fernández-Cuesta L, Bosco G, Müller C, Dahmen I, Jahchan NS, et al. Comprehensive genomic profiles of small cell lung cancer. *Nature*. 2015; 524:47–53.  
<https://doi.org/10.1038/nature14664>  
PMID:[26168399](https://pubmed.ncbi.nlm.nih.gov/26168399/)
  19. Zhang S, Li S, Cheng Y. Efficacy and safety of PD-1/PD-L1 inhibitor plus chemotherapy versus chemotherapy alone as first-line treatment for extensive-stage small cell lung cancer: A systematic review and meta-analysis. *Thorac Cancer*. 2020; 11:3536–46.  
<https://doi.org/10.1111/1759-7714.13698>  
PMID:[33058504](https://pubmed.ncbi.nlm.nih.gov/33058504/)
  20. Arriola E, González-Cao M, Domine M, De Castro J, Cobo M, Bernabé R, Navarro A, Sullivan I, Trigo JM, Mosquera J, Crama L, Isla D. Addition of Immune Checkpoint Inhibitors to Chemotherapy vs Chemotherapy Alone as First-Line Treatment in Extensive-Stage Small-Cell Lung Carcinoma: A Systematic Review and Meta-Analysis. *Oncol Ther*. 2022; 10:167–84.  
<https://doi.org/10.1007/s40487-021-00182-0>  
PMID:[35032007](https://pubmed.ncbi.nlm.nih.gov/35032007/)
  21. Abunasser AAA, Xue J, Balawi EJA, Zhu Y. Combination of the EP and Anti-PD-1 Pathway or Anti-CTLA-4 for the Phase III Trial of Small-Cell Lung Cancer: A Meta-Analysis. *J Oncol*. 2021; 2021:6662344.  
<https://doi.org/10.1155/2021/6662344>  
PMID:[34122547](https://pubmed.ncbi.nlm.nih.gov/34122547/)
  22. Lee S, Shim HS, Ahn BC, Lim SM, Kim HR, Cho BC, Hong MH. Efficacy and safety of atezolizumab, in combination with etoposide and carboplatin regimen, in the first-line treatment of extensive-stage small-cell lung cancer: a single-center experience. *Cancer Immunol Immunother*. 2022; 71:1093–101.  
<https://doi.org/10.1007/s00262-021-03052-w>  
PMID:[34568975](https://pubmed.ncbi.nlm.nih.gov/34568975/)
  23. Chen CR, Qi WX, Liu T, Tong X. Efficacy of addition immune checkpoint inhibitors to chemotherapy as first-line treatment for small cell lung cancer patients with liver or brain metastases: a systematic review and meta-analysis. *Eur Rev Med Pharmacol Sci*. 2022; 26:5857–67.  
[https://doi.org/10.26355/eurev\\_202208\\_29525](https://doi.org/10.26355/eurev_202208_29525)  
PMID:[36066161](https://pubmed.ncbi.nlm.nih.gov/36066161/)
  24. Xia H, Zhang W, Zhang Y, Shang X, Liu Y, Wang X. Liver metastases and the efficacy of immune checkpoint inhibitors in advanced lung cancer: A systematic review and meta-analysis. *Front Oncol*. 2022; 12:978069.  
<https://doi.org/10.3389/fonc.2022.978069>  
PMID:[36330494](https://pubmed.ncbi.nlm.nih.gov/36330494/)
  25. Horst AK, Neumann K, Diehl L, Tiegs G. Modulation of liver tolerance by conventional and nonconventional antigen-presenting cells and regulatory immune cells. *Cell Mol Immunol*. 2016; 13:277–92.  
<https://doi.org/10.1038/cmi.2015.112> PMID:[27041638](https://pubmed.ncbi.nlm.nih.gov/27041638/)
  26. Maeda T, Ueoka H, Tabata M, Kiura K, Shibayama T, Gemba K, Takigawa N, Hiraki A, Katayama H, Harada M. Prognostic factors in advanced non-small cell lung cancer: elevated serum levels of neuron specific enolase indicate poor prognosis. *Jpn J Clin Oncol*. 2000; 30:534–41.  
<https://doi.org/10.1093/jjco/hyd139> PMID:[11210162](https://pubmed.ncbi.nlm.nih.gov/11210162/)
  27. Yu J, Green MD, Li S, Sun Y, Journey SN, Choi JE, Rizvi SM, Qin A, Waninger JJ, Lang X, Chopra Z, El Naqa I, Zhou J, et al. Liver metastasis restrains immunotherapy

efficacy via macrophage-mediated T cell elimination. Nat Med. 2021; 27:152–64.

<https://doi.org/10.1038/s41591-020-1131-x>

PMID:[33398162](https://pubmed.ncbi.nlm.nih.gov/33398162/)

28. Borghaei H, Langer CJ, Paz-Ares L, Rodríguez-Abreu D, Halmos B, Garassino MC, Houghton B, Kurata T, Cheng Y, Lin J, Pietanza MC, Piperdi B, Gadgeel SM.

Pembrolizumab plus chemotherapy versus chemotherapy alone in patients with advanced non-small cell lung cancer without tumor PD-L1 expression: A pooled analysis of 3 randomized controlled trials. Cancer. 2020; 126:4867–77.

<https://doi.org/10.1002/cncr.33142>

PMID:[32914866](https://pubmed.ncbi.nlm.nih.gov/32914866/)
